# Supplementary material for: Reverse transcription through a bulky triazole linkage in RNA: implications for RNA sequencing
Source: Royal Society of Chemistry journal article supplement (doi:10.1039/c4cc03027c), 2014-01-01
Supplement: c4cc03027c1.pdf [file c4cc03027c1.pdf]

## Supporting Information

### Reverse transcription through a bulky triazole linkage in RNA: implications for RNA sequencing

Xiong Chen<sup>a</sup>, Afaf H. El-Sagheer<sup>b,c</sup> and Tom Brown.<sup>c\*</sup>

<sup>a</sup>School of Chemistry, University of Southampton, Highfield, Southampton. SO17 1BJ, UK. <sup>b</sup>Chemistry Branch, Dept. of Science and Mathematics, Faculty of Petroleum and Mining Engineering, Suez University, Suez, 43721, Egypt. <sup>c</sup>Department of Chemistry, University of Oxford, Chemistry Research Laboratory, 12 Mansfield Road, Oxford, OX1 3TA, UK. \*e.mail: tom.brown@chem.ox.ac.uk.

### Preparation of 5'-O-(4,4'-dimethoxytrityl)-2'-azido-2'-deoxycytidine on solid support (2)

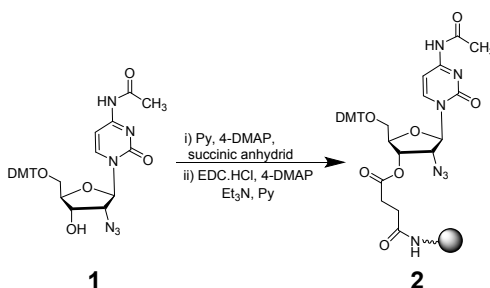

The solid support, Amino-SynBase resin 1000/100 (Link Technologies, Glasgow, UK) (1000 Å pore size, loading 59 µmol/g, 0.5 g, 29.5 µmol) was treated with 3% trichloroacetic acid (TCA) in dichloromethane (DCM) for 4 h in a stoppered glass vessel fitted with a sinter and tap. The solvents were then removed by filtration and the support was washed with triethylamine:di-isopropylethylamine (9:1), dichloromethane (DCM) and diethyl ether. The support was dried under vacuum for 1 h then soaked in dry pyridine for 10 min. A solution of succinic anhydride (250 mg, 2.5 mmol) and 4-dimethylaminopyridine (DMAP) (25 mg, 0.21 mmol) in dry pyridine (5 mL) was added and the vessel was rotated for 20 h. The support was washed with pyridine, DCM and diethyl ether, dried and soaked in pyridine for 10 min. A solution of ethyldimethylaminopropylcarbodi-imide hydrochloride (EDC.HCl) (96 mg, 0.5 mmol), DMAP (4 mg, 0.033 mmol) and triethylamine (20 µL) in dry pyridine (5 mL) was added to the solid support in the vessel followed by compound **1** (90 mg, 0.147 mmol)<sup>1</sup> in dry pyridine (2 mL). The reaction vessel was left to rotate for 20 h at room temperature then pentachlorophenol (34 mg, 0.13 mmol) was added and the vessel was rotated for a further 3 h. The solvent was then removed by filtration and the support was washed with pyridine, DCM and diethyl ether. Piperidine (10% in DMF, 10 mL) was added and after rotating the

vessel for 1 min the solid support was washed with DCM and diethyl ether (note that during treatment of the support with piperidine to cap the unreacted succinic acid groups the loading of nucleoside decreased with time due to cleavage of the succinyl linkage. Therefore only a brief 1 min piperidine treatment was carried out).

Capping reagent (oligonucleotide synthesis grade, acetic anhydride/pyridine/tetrahydrofuran: *N*-methyl imidazole in tetrahydrofuran, 1:1, 10 mL, Applied Biosystems) was added and the vessel was rotated for 1 h after which the support was washed with pyridine, DCM and diethyl ether, then left to dry under vacuum overnight. The loading of (**1**) on the support was 25  $\mu\text{mol/g}$ , as determined colorimetrically from the cleaved DMT group.

5'-*O*-(4,4'-dimethoxytrityl)-2'-azido-2'-deoxyuridine was attached to the solid support in the same manner as explained above.

## **Oligonucleotide Synthesis and purification**

### **General method**

Standard DNA phosphoramidites, solid supports, and additional reagents were purchased from Link Technologies, Berry&Associates, Glen Research, Sigma-Aldrich and Applied Biosystems Ltd. All oligonucleotides were synthesized on an Applied Biosystems 394 automated DNA/ RNA synthesizer using a standard 0.2 or 1.0  $\mu\text{mol}$  phosphoramidite cycle of acid-catalyzed detritylation, coupling, capping, and iodine oxidation. Stepwise coupling efficiencies and overall yields were determined by the automated trityl cation conductivity monitoring facility and in all cases were >98.0%. All  $\beta$ -cyanoethyl phosphoramidite monomers were dissolved in anhydrous acetonitrile to a concentration of 0.1 M immediately prior to use. The coupling time for normal A, G, C, and T monomers was 40 s and the coupling time for the 5'-BCN phosphoramidite monomer was extended to 480 s. 2'-azido oligonucleotides were synthesized on the 1.0  $\mu\text{mol}$  scale using the 5'-*O*-(4,4'-dimethoxytrityl)-2'-azido-2'-deoxy(cytidine) or (uridine) solid support (25  $\mu\text{mol/g}$  loading) which were synthesised as explained above. The resin was packed into a twist column (Glen Research) then used to assemble the required oligonucleotide sequence in the 3'- to 5'-direction by standard phosphoramidite oligonucleotide methods. Cleavage of oligonucleotides from the solid support and deprotection was achieved by exposure to concentrated aqueous ammonia solution for 60 min at room temperature followed by heating in a sealed tube for 5 h at 55 °C.

RNA oligonucleotides were prepared using 2'-TBS protected RNA phosphoramidite monomers with *t*-butylphenoxyacetyl protection of the A, G and C nucleobases and unprotected U (Sigma-Aldrich). A solution of 0.3 M benzylthiotetrazole in acetonitrile (Link Technologies) was used as the coupling agent, *t*-butylphenoxyacetic anhydride as the capping agent and 0.1 M iodine as the oxidizing agent (Sigma-Aldrich). All phosphoramidite monomers were dissolved in anhydrous acetonitrile to a concentration of 0.1 M immediately prior to use, and the coupling time for all monomers was 6 min. Stepwise coupling efficiencies were determined by automated trityl cation conductivity monitoring and in all cases were >97%. Cleavage of oligonucleotides from the solid support and deprotection were achieved by exposure to concentrated aqueous ammonia/ethanol (3/1 v/v) for 2 h at room temperature followed by heating in a sealed tube for 45 min at 55 °C.

### **2'-TBS deprotection of RNA oligoribonucleotides**

After cleavage from the solid support and deprotection of the nucleobases and phosphodiester, oligonucleotides were concentrated to a small volume *in vacuo* (until turbidity starts to appear), transferred to 15 mL plastic tubes and freeze dried. The residue was dissolved in DMSO (300 µL) and triethylamine trihydrofluoride (300 µL) was added after which the reaction mixtures were kept at 65 °C for 2.5 h. Sodium acetate (3 M, 50 µL) and butanol (3 mL) were added with vortexing and the samples were kept at -80 °C for 30 min then centrifuged at 4 °C at 13,000 rpm for 10 min. The supernatant was decanted and the precipitate was washed twice with ethanol (0.75 mL) then dried under vacuum.

### **Purification of oligonucleotides (DNA or RNA)**

The fully deprotected oligonucleotides were purified by reversed-phase HPLC on a Gilson system using a Luna 10µ C8 100Å pore Phenomenex 10x250 mm column with a gradient of acetonitrile in triethylammonium acetate or ammonium acetate (0% to 50% buffer B over 20 min, flow rate 4 mL/min), (buffer A: 0.1 M triethylammonium acetate, pH 7.0, buffer B: 0.1 M triethylammonium acetate, pH 7.0, with 50% acetonitrile). Elution was monitored by UV absorption at 295 nm. After HPLC purification, oligonucleotides were desalted using NAP-25 then NAP-10 columns (GE Healthcare). For RNA oligonucleotides, HPLC using triethylammonium bicarbonate buffer (buffer A: 0.1 M triethylammonium bicarbonate, pH 7.5, buffer B: 0.1 M triethylammonium bicarbonate, pH 7.5, with 50% acetonitrile) was used

to avoid desalting and degradation of the RNA. The fractions from HPLC were evaporated without additional desalting.

All oligonucleotides were characterised by negative-mode electrospray HPLC-mass spectrometry in water, using a Bruker Daltronics micrO-TOF mass spectrometer, using an Acquity UPLC BEH C18 1.7  $\mu\text{m}$  HPLC column (Waters), with a gradient of TEAA/ $\text{CH}_3\text{CN}$  in TEAA/HFIP buffer, increasing from 5-40% buffer B over 14 minutes, with a flow rate of  $0.1 \text{ mL min}^{-1}$  (buffer A: 10 mM TEAA, 100 mM HFIP ( $\text{H}_2\text{O}$ ); buffer B: 20 mM TEAA ( $\text{CH}_3\text{CN}$ )). Raw data was processed/deconvoluted using the DataAnalysis function of the Bruker Daltronics Compass<sup>TM</sup> 1.3 software package.

### **Non-templated and template copper catalysed click reactions**

A solution of degassed  $\text{Cu}^{\text{I}}$  click catalyst was prepared from *tris*-hydroxypropyltriazole ligand (THPTA) (2.1 mg in 25  $\mu\text{L}$  water), sodium ascorbate (14  $\mu\text{L}$  of 0.5 M solution in water) and  $\text{CuSO}_4 \cdot 5\text{H}_2\text{O}$  (7  $\mu\text{L}$  of 0.1 M solution in water). In case of the non-templated reaction, this solution was added to a solution of the azide and alkyne oligonucleotides (30 nmol of each in 80  $\mu\text{L}$  water). In case of the templated reaction, a splint oligonucleotide (30 nmol) was added to the mixture of the azide and alkyne oligonucleotides (30 nmol each) in 950  $\mu\text{L}$  of 0.2 M NaCl solution followed by annealing before adding the copper catalyst solution as explained above. The reaction mixture was kept under argon at r.t. for 2 h. Reagents were removed using NAP-10 gel-filtration columns and the ligated RNA was analysed and purified by denaturing 20% polyacrylamide gel electrophoresis (PAGE). The product bands were cut then soaked in Tris-HCl buffer (50 mM Tris-base, 25 mM NaCl, pH 7.5) at 37  $^\circ\text{C}$  overnight and desalted by NAP-25 followed by NAP-10 gel-filtration then lyophilized.

### **Non-templated copper free click reaction**

A mixture of the alkyne (5'-BCN) (DNA or RNA) and azide (2'-azide) (RNA) oligonucleotides (30 nmol each) in 60  $\mu\text{L}$  water was kept at room temperature for 2 h then lyophilized before loading to 20% polyacrylamide gel electrophoresis.

The product bands were cut then soaked in Tris-HCl buffer (50 mM Tris-base, 25 mM NaCl, pH 7.5) in case of RNA, or in water in case of DNA at 37  $^\circ\text{C}$  overnight, then desalted by NAP-25 followed by NAP-10 gel-filtration and lyophilized.

### **Reverse transcription of BCN templates**

In a total reaction volume of 20  $\mu\text{L}$ , 3  $\mu\text{M}$  primer, 3  $\mu\text{M}$  template, 1x M-MuLV Reverse Transcriptase (RNase H<sup>-</sup>) reaction buffer (NEB, 50 mM Tris-HCl, 75 mM KCl, 3 mM MgCl<sub>2</sub>, pH 8.3 at r.t.), 10 mM DTT (NEB), 0.5 mM dNTP (Promega), 200 u M-MuLV Reverse Transcriptase (1  $\mu\text{L}$ , NEB<sup>®</sup> #M0253) or M-MuLV Reverse Transcriptase (RNase H<sup>-</sup>, 1  $\mu\text{L}$ , NEB<sup>®</sup> #M0368) were mixed and incubated on a BIO-RAD T100<sup>™</sup> Thermal Cycler at 37 °C for different time courses. In some experiments, a specific concentration of Mn<sup>2+</sup> was added to Mg<sup>2+</sup> free buffer. In other experiments, Mn<sup>2+</sup> was added to the buffer in the presence of Mg<sup>2+</sup>. The enzymatic reaction was stopped by freezing the sample in liquid nitrogen then mixing with an equal volume of formamide and directly loaded onto the gel for PAGE analysis (20 % acrylamide, 600v for 5 h) or diluted to 1 mL and desalted by NAP-10 then freeze-dried overnight for HPLC-MS analysis. To give clear spectra, the RNA template in some HPLC-MS samples was digested by RNase H after reverse-transcription (NEB, 1x MuLV RT (RNase H<sup>-</sup>) buffer, 10 mM additional DTT, 5 u RNase H (25  $\mu\text{L}$ ) was added to 50  $\mu\text{L}$  reverse-transcription solution, incubated at 37 °C for 6 h, gel-filtered (NAP-10), lyophilized then dissolved in 10  $\mu\text{L}$  water for MS.

To minimize the co-migration of the RNA template and the DNA products during PAGE that results from duplex formation, a 10-fold excess of the full length unlabelled DNA strand complementary to the RNA template was added together with the reverse-transcription product. The mixture was heated at 90 °C for 10 min then cooled down to RT. The samples were then mixed with an equal volume of formamide and loaded for PAGE.

**Table 1: oligonucleotide used in this study**

1a alkyne and azide ODNs and splints

| Code | Sequence (5' - 3')                                         | 5'         | 3'             | Calc. | Found |
|------|------------------------------------------------------------|------------|----------------|-------|-------|
| K1   | r <sup>P</sup> UAAAUGC UAAUCGUGAUAGGGGU-Me dC <sup>K</sup> | phosphate  | propargyl MedC | 7809  | 7810  |
| Z1   | r <sup>Z</sup> UAGAUCGGAAGAGCGGUUCAG                       | 5'-azido U |                | 6839  | 6840  |
| K2   | r <sup>P</sup> UAAAUGC UAAUCGUGAUAGGGGUC <sup>K</sup>      | phosphate  | propargyl rC   | 7811  | 7812  |
| K3   | rUAAAUGC UAAUCGUGAUAGGGGUC <sup>K</sup>                    |            | Propargyl rC   |       |       |
| O1   | r <sup>O</sup> CAGAUCGGAAGAGCGGUUCAG                       | BCN        |                | 7040  | 7040  |
| Z2   | r <sup>P</sup> UAAAUGC UAAUCGUGAUAGGGGUU <sup>Z</sup>      | phosphate  | 2'-azido-2'-dU | 7799  | 7800  |
| Z3   | rUAAAUGC UAAUCGUGAUAGGGGUC <sup>Z</sup>                    |            | 2'-azido-2'-dC | 7718  | 7719  |
| O2   | d <sup>O</sup> CAGATCGGAAGAGCGGTTCCAG                      | BCN        |                | 6746  | 6746  |
| Z4   | r <sup>Z</sup> CAGAUCGGAAGAGCGGUUCAG                       | 5'-azido C |                | 6839  | 6839  |
| S1   | dCCGATCTAGACCCCT                                           |            |                | 4473  | 4473  |
| S2   | dCCGATCTGGACCCCT                                           |            |                | 4489  | 4488  |

1b. Reverse Transcriptase Templates, sequence in green is DNA

| Code         | Sequence (5' - 3') RNA                                                                    | Calc. | Found |
|--------------|-------------------------------------------------------------------------------------------|-------|-------|
| T1 (K1+Z1)   | <sup>P</sup> UAAAUGC UAAUCGUGAUAGGGGU dC <sup>Me</sup> <sub>i</sub> UAGAUCGGAAGAGCGGUUCAG | 14648 | 14650 |
| T2 (K3+Z1)   | UAAAUGC UAAUCGUGAUAGGGGU C <sub>i</sub> UAGAUCGGAAGAGCGGUUCAG                             | 14570 | 14571 |
| T3 (Control) | UAAAUGC UAAUCGUGAUAGGGGU C <sub>i</sub> UAGAUCGGAAGAGCGGUUCAG                             | 14570 | 14572 |
| T4 (K2+Z4)   | <sup>P</sup> UAAAUGC UAAUCGUGAUAGGGGU C <sub>i</sub> CAGAUCGGAAGAGCGGUUCAG                | 14649 | 14651 |
| T5 (K1+Z4)   | <sup>P</sup> UAAAUGC UAAUCGUGAUAGGGGU dC <sup>Me</sup> <sub>i</sub> CAGAUCGGAAGAGCGGUUCAG | 14647 | 14648 |
| T6 (Control) | UAAAUGC UAAUCGUGAUAGGGGU C <sub>i</sub> CAGAUCGGAAGAGCGGUUCAG                             | 14569 | 14570 |
| T7 (Z2+O1)   | <sup>P</sup> UAAAUGC UAAUCGUGAUAGGGGU U <sub>x</sub> CAGAUCGGAAGAGCGGUUCAG                | 14839 | 14839 |
| T8 (Z3+O1)   | UAAAUGC UAAUCGUGAUAGGGGU C <sub>x</sub> CAGAUCGGAAGAGCGGUUCAG                             | 14758 | 14759 |
| T9 (Z3+O2)   | UAAAUGC UAAUCGUGAUAGGGGU C <sub>x</sub> CAGATCGGAAGAGCGGTTCCAG                            | 14464 | 14465 |

1c. Reverse Transcriptase primers

| Code | Sequence (5' - 3')             | position | Calc. | Found |
|------|--------------------------------|----------|-------|-------|
| P1   | Fam-dCTGAACCGCTCTTC            | -7       | 4711  | 4711  |
| P2   | Fam-dCTGAACCGCTCTTCCGAT        | -3       | 5947  | 5947  |
| P3   | Fam-dCTGAACCGCTCTTCCGATCTA     | +0       | 6853  | 6854  |
| P4   | Fam-dCTGAACCGCTCTTCCGATCTAG    | +1       | 7183  | 7183  |
| P5   | Fam-dCTGAACCGCTCTTCCGATCTAGACC | +4       | 8074  | 8075  |
| P6   | Fam-dCTGAACCGCTCTTCCGATCTG     | +0       | 6869  | 6870  |
| P7   | Fam-dCTGAACCGCTCTTCCGATCTGG    | +1       | 7199  | 7199  |
| P8   | Fam-dCTGAACCGCTCTTCCGATCTGGACC | +4       | 8090  | 8090  |

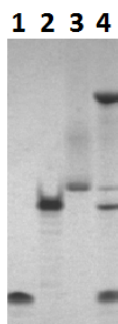

**Figure S1: Templated CuAAC click ligation to synthesize T2.** Lane 1; S1, lane 2; 5'-azide oligo Z1, lane 3; alkyne oligo K3, lane 4; crude reaction mixture. 20% Polyacrylamide gel.

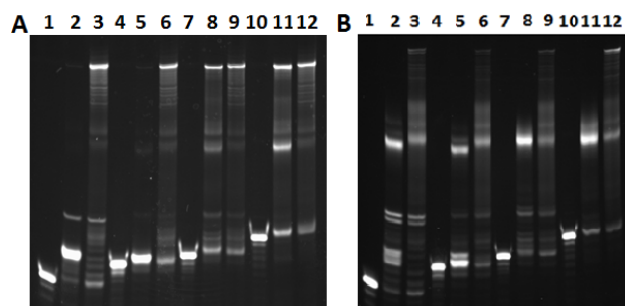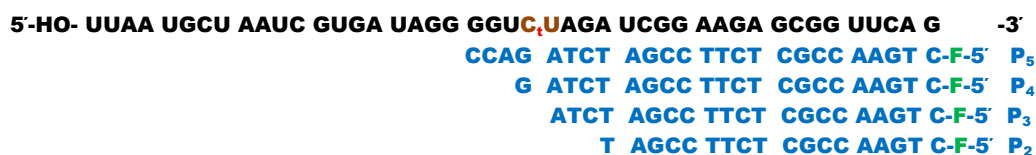

**Figure S2: Mn<sup>2+</sup> ions enhance the reverse transcriptase read through of the RNA-RNA triazole linkage.** Reverse-transcription of triazole template T2 (C<sub>1</sub>U) and control T3 by M-MuLV reverse-transcriptase (RNase H<sup>-</sup>) in 3mM Mg<sup>2+</sup> buffer (A) and 3mM Mn<sup>2+</sup> buffer (B). Lane 1; primer P2 (-3), lane 2 and 3; reverse transcription product of T2 and T3 using primer P2, lane 4; primer P3 (+0), lane 5 and 6; reverse transcription product of T2 and T3 using primer P3, lane 7; primer P4 (+1), lane 8 and 9; reverse transcription product of T2 and T3 using primer P4, lane 10; primer P5 (+4), lane 11 and 12; reverse transcription product of T2 and T3 using primer P5. The transcription products run as two bands (single stranded and double stranded with the RNA template). This problem was overcome in the later gels by adding a 10-fold excess of the full length unlabelled DNA strand complementary to the RNA template to the reverse-transcription product. P1 (-7) was also used and gave similar results. In some experiments, Mn<sup>2+</sup> was added to Mg<sup>2+</sup> containing buffer and results were similar to those which formed from using Mn<sup>2+</sup> in Mg<sup>2+</sup> free buffer. This indicates that Mn<sup>2+</sup> enhances the reverse transcription reaction in the presence or absence of the Mg<sup>2+</sup> ions.

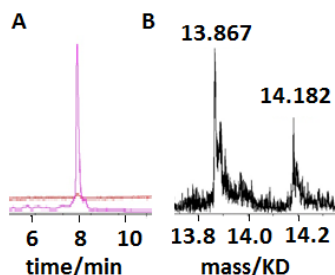

**Figure S3: A) HPLC and B) mass spectrum of the M-MuLV reverse transcriptase (RNase H<sup>-</sup>) products (gel purified) of the triazole template T2:** (M minus "G", cal. 13867), (M minus "G" plus "A", cal. 14180). The "plus A" fragment likely resulted from the terminal transferase activity of the reverse-transcriptase. (6 mM Mn<sup>2+</sup> and primer P1 (-7) were used)

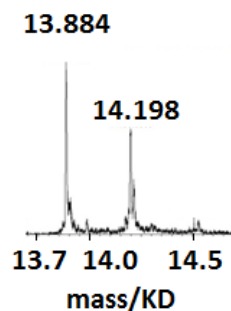

**Figure S4: Mass spectrum of reverse transcriptase product of T5:** M-MuLV reverse transcriptase with 3 mM Mg<sup>2+</sup> and primer P1 (-7), incubated at 37 °C for 2 h. Calc. Mass: 13883 (M - G); 14196 (M-G+A).

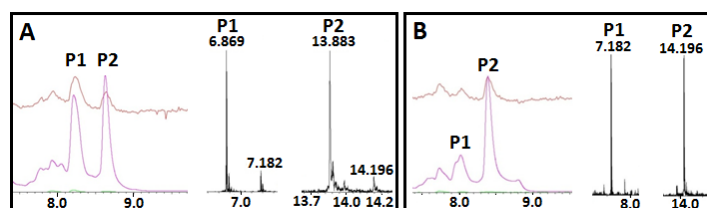

**Figure S5: Reverse transcriptase reads through the triazole linkage after overnight incubation.** HPLC traces and mass spectra of the reverse transcription product of T8, A) after incubation at 37 °C for 2 h, P1: shows the product formed from RT termination before triazole, Calc. 6869 and RT termination before triazole “+A”, Calc. 7183; P2: “M-G” Calc. 13883 and “M-G+A” Calc. 14196. B) After incubation at 37 °C overnight, P1: shows the product formed from RT termination before triazole “+A” Calc. 7183, P2: “M-G+A” Calc. 14196. M-MuLV reverse transcriptase (RNase H<sup>-</sup>), 3 mM Mg<sup>2+</sup> buffer and primer P1 (-7) were used. After the incubation time, digestion of the RNA template by RNase H and desalting by gel-filtration (NAP-10) was carried out.

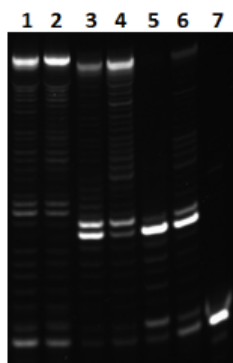

**Figure S6: Mn<sup>2+</sup> ions enhance the reverse transcriptase read through of the RNA-DNA triazole linkage.** Lane 1 and 2; reverse transcription of control T6 after 2h and 16h using 3 mM Mn<sup>2+</sup>, lane 3 and 4; reverse transcription of triazole template T9 after 2h and 16h using 3 mM Mn<sup>2+</sup>, lane 5 and 6; reverse transcription of triazole template T9 after 2h and 16h using 3 mM Mg<sup>2+</sup>, lane 7; primer P1 (-7). 20% polyacrylamide gel



## DNA sequencing analysis

The reverse transcription products were obtained using unlabelled RT primer (5'-CTGAACCGCTCTTC, same sequence as P1 with no 5'-FAM), templates (T8, C<sub>x</sub>C), (T6, control CC) or (T7, U<sub>x</sub>C). Mg<sup>2+</sup> buffer was used in the case of templates T8 and T6 while Mg<sup>2+</sup> + Mn<sup>2+</sup> buffer was used in case of template T7.

3 μM primer (300 pmol), 3 μM template (300 pmol), 1x supplied M-MuLV Reverse Transcriptase (RNase H<sup>-</sup>) Reaction Buffer (50 mM Tris-HCl, 75 mM KCl, 3 mM MgCl<sub>2</sub>, or 3 mM MnCl<sub>2</sub>, pH 8.3 at room temperature), 10 mM DTT, 0.5 mM dNTP (each triphosphate), 1000 U (5 μL) M-MuLV Reverse Transcriptase (RNase H<sup>-</sup>)(NEB<sup>®</sup>) in a total volume of 100 μL. Reverse transcription was carried out at 37 °C for 18h.

cDNAs formed from the reverse transcription of T7 (U<sub>x</sub>C), T8 (C<sub>x</sub>C) and T6 (CC control) were purified on a 20% polyacrylamide gel (PAGE). Three PCR reactions (50 μL) were carried out using GoTaq DNA polymerase, the PAGE purified DNA and two tailed primers as shown below. The PCR products were purified using a 2% agarose gel followed by extraction using QIAquick Gel Extraction kit (50) Cat. No.28704.

5' -UUAUUGC UAAUUCGUGAUAGGGGUCx CAGAUCGGAAGAGCGGUUCAG-3' C<sub>x</sub>C template  
3' -AATTACGATTAGCACTATCCCCAG-GTCTAGCCTTCTCGCCAAGTC-5' RT product

Primers  
5' GCATTTCGAGCAACGTAAGTTAATGCTAATCGTGA GCCTTCTCGCCAAGTCGACGGCTGTGTGATTGG-5'

PCR reaction mixture: 25 pmol each primer (final 0.5 μM), 0.002 pmol template, 1x Green GoTaq<sup>®</sup> Reaction Buffer, 2.5 μL 10 mM dNTP (Promega<sup>®</sup>, final 0.5 mM), 6.25 u GoTaq<sup>®</sup> DNA polymerase (5u/μL) in total 50 μL.

PCR condition: 95 °C for 2 min, then 30 cycles of 95 °C for 30 sec, 45 °C for 30 sec, 72 °C for 30 sec.

Cloning and automated Sanger sequencing of these PCR products were performed and the results are shown below. M-MLV RT reads through the unnatural BCN-triazole linkages in RNA with omission of one nucleotide (the first base after the triazole). There are few mutations in other regions of the templates. However similar mutations also appeared in the control sequences suggesting that the mutations far from the triazole site may have occurred during the sequencing and cloning process.

## T6 CC control, red **GG** in cDNA strand

```
Sequence 1 GGTATGTGTGTCGGCAGCTGAACCGCTCTCCGATCTGGACCCCTATCACGATTAGCATTAACTTACGTTGCTCGAATGC
Sequence 2 GGTATGTGTGTCGGCAGCTGAACCGCTCTCCGATCTGGACCCCTATCACGATTAGCATTAACTTACGTTGCTCGAATGC
Sequence 3 GGTATGTGTGTCGGCAGCTGAACCGCTCTCCGATCTGGACCCCTATCACGATTAGCATTAACTTACGTTGCTCGAATGC
Sequence 4 GGTATGTGTGTCGGCAGCTGAACCGCTCTCCGATCTGGACCCCTATCACGATTAGCATTAACTTACGTTGCTCGAATGC
Sequence 5 GGTATGTGTGTCGGCAGCTGAACCGCTCTCCGATCTGGACCCCTATCACGATTAGCATTAACTTACGTTGCTCGAATGC
Sequence 6 GGTATGTGTGTCGGCAGCTGAACCGCTCTCCGATCTGGACCCCTATCACGATTAGCATTAACTTACGTTGCTCGAATGC
Sequence 7 GGTATGTGTGTCGGCAGCTGAACCGCTCTCCGATCTGGACCCCTATCACGATTAGCATTAACTTACGTTGCTCGAATGC
Sequence 8 GGTATGTGTGTCGGCAGCTGAACCGCTCTCCGATCTGGACCCCTATCACGATTAGCATTAACTTACGTTGCTCGAATGC
Sequence 9 GGTATGTGTGTCGGCAGCTGAACCGCTCTCCGATCTGGACCCCTATCACGATTAGCATTAACTTACGTTGCTCGAATGC
Sequence 10 GGTATGTGTGTCGGCAGCTGAACCGCTCTCCGATCTGGACCCCTATCACGATTAGCATTAACTTACGTTGCTCGAATGC
Sequence 11 GGTATGTGTGTCGGCAGCTGAACCGCTCTCCGATCTGGACCCCTATCACGATTAGCATTAACTTACGTTGCTCGAATGC
Sequence 12 GGTATGTGTGTCGGCAGCTGAACCGCTCTCCGATCTGGACCCCTATCACGATTAGCATTAACTTACGTTGCTCGAATGC
Sequence 13 GGTATGTGTGTCGGCAGCTGAACCGCTCTCCGATCTGGACCCCTATCACGATTAGCATTAACTTACGTTGCTCGAATGC
Sequence 14 GGTATGTGTGTCGGCAGCTGAACCGCTCTCCGATCTGGACCCCTATCACGATTAGCATTAACTTACGTTGCTCGAATGC
Sequence 15 GGTATGTGTGTCGGCAGCTGAACCGCTCTCCGATCTGGACCCCTATCACGATTAGCATTAACTTACGTTGCTCGAATGC
Sequence 16 GGTATGTGTGTCGGCAGCTGAACCGCTCTCCGATCTGGACCCCTATCACGATTAGCATTAACTTACGTTGCTCGAATGC
Sequence 17 GGTATGTGTGTCGGCAGCTGAACCGCTCTCCGATCTGGACCCCTATCACGATTAGCATTAACTTACGTTGCTCGAATGC
Sequence 18 GGTATGTGTGTCGGCAGCTGAACCGCTCTCCGATCTGGACCCCTATCACGATTAGCATTAACTTACGTTGCTCGAATGC
Sequence 19 GGTATGTGTGTCGGCAGCTGAACCGCTCTCCGATCTGGACCCCTATCACGATTAGCATTAACTTACGTTGCTCGAATGC
Required GGTATGTGTGTCGGCAGCTGAACCGCTCTCCGATCTGGACCCCTATCACGATTAGCATTAACTTACGTTGCTCGAATGC
```

## T8 C<sub>x</sub>C in RT template should be copied as **GG** in the cDNA strand

```
Sequence 1 GGTATGTGTGTCGGCAGCTGAACCGCTCTCCGATCTG-ACCCCTATCACGATTAGCATTAACTTACGTTGCTCGAATGC
Sequence 2 GGTATGTGTGTCGGCAGCTGAACCGCTCTCCGATCTG-ACCCCTATCACGATTAGCATTAACTTACGTTGCTCGAATGC
Sequence 3 GGTATGTGTGTCGGCAGCTGAACCGCTCTCCGATCTG-ACCCCTATCACGATTAGCATTAACTTACGTTGCTCGAATGC
Sequence 4 GGTATGTGTGTCGGCAGCTGAACCGCTCTCCGATCTG-ACCCCTATCACGATTAGCATTAACTTACGTTGCTCGAATGC
Sequence 5 GGTATGTGTGTCGGCAGCTGAACCGCTCTCCGATCTG-ACCCCTATCACGATTAGCATTAACTTACGTTGCTCGAATGC
Sequence 6 GGTATGTGTGTCGGCAGCTGAACCGCTCTCCGATCTG-ACCCCTATCACGATTAGCATTAACTTACGTTGCTCGAATGC
Sequence 7 GGTATGTGTGTCGGCAGCTGAACCGCTCTCCGATCTG-ACCCCTATCACGATTAGCATTAACTTACGTTGCTCGAATGC
Sequence 8 GGTATGTGTGTCGGCAGCTGAACCGCTCTCCGATCTG-ACCCCTATCACGATTAGCATTAACTTACGTTGCTCGAATGC
Sequence 9 GGTATGTGTGTCGGCAGCTGAACCGCTCTCCGATCTG-A-CCCTATCACGATTAGCATTAACTTACGTTGCTCGAATGC
Sequence 10 GGTATGTGTGTCGGCAGCTGAACCGCTCTCCGATCTG-ACCCCTATCACGATTAGCATTAACTTACGTTGCTCGAATGC
Sequence 11 GGTATGTGTGTCGGCAGCTGAACCGCTCTCCGATCTG-ACCCCTATCACGATTAGCATTAACTTACGTTGCTCGAATGC
Sequence 12 GGTATGTGTGTCGGCAGCTGAACCGCTCTCCGATCTG-ACCCCTATCACGATTAGCATTAACTTACGTTGCTCGAATGC
Sequence 13 GGTATGTGTGTCGGCAGCTGAACCGCTCTCCGATCTG-ACCCCTATCACGATTAGCATTAACTTACGTTGCTCGAATGC
Sequence 14 GGTATGTGTGTCGGCAGCTGAACCGCTCTCCGATCTG-ACCCCTATCACGATTAGCATTAACTTACGTTGCTCGAATGC
Sequence 15 GGTATGTGTGTCGGCAGCTGAACCGCTCTCCGATCTG-ACCCCTATCACGATTAGCATTAACTTACGTTGCTCGAATGC
Sequence 16 GGTATGTGTGTCGGCAGCTGAACCGCTCTCCGATCTG-ACCCCTATCACGATTAGCATTAACTTACGTTGCTCGAATGC
Sequence 17 GGTATGTGTGTCGGCAGCTGAACCGCTCTCCGATCTG-ACCCCTATCACGATTAGCATTAACTTACGTTGCTCGAATGC
Required GGTATGTGTGTCGGCAGCTGAACCGCTCTCCGATCTGGACCCCTATCACGATTAGCATTAACTTACGTTGCTCGAATGC
```

## T7 U<sub>x</sub>C in RT template should be copied as **GA** in the cDNA strand

```
Sequence 1 GGTATGTGTGTCGGCAGCTGAACCGCTCTCCGATCTG-ACCCCTATCACGATTAGCATTAACTTACGTTGCTCGAATGC
Sequence 2 GGTATGTGTGTCGGCAGCTGAACCGCTCTCCGATCTG-ACCCCTATCACGATTAGCATTAACTTACGTTGCTCGAATGC
Sequence 3 GGTATGTGTGTCGGCAGCTGAACCGCTCTCCGATCTG-ACCCCTATCACGATTAGCATTAACTTACGTTGCTCGAATGC
Sequence 4 GGTATGTGTGTCGGCAGCTGAACCGCTCTCCGATCTG-ACCCCTATCACGATTAGCATTAACTTACGTTGCTCGAATGC
Sequence 5 GGTATGTGTGTCGGCAGCTGAACCGCTCTCCGATCTG-ACCCCTATCACGATTAGCATTAACTTACGTTGCTCGAATGC
Sequence 6 GGTATGTGTGTCGGCAGCTGAACCGCTCTCCGATCTG-ACCCCTATCACGATTAGCATTAACTTACGTTGCTCGAATGC
Sequence 7 GGTATGTGTGTCGGCAGCTGAACCGCTCTCCGATCTG-ACCCCTATCACGATTAGCATTAACTTACGTTGCTCGAATGC
Sequence 8 GGTATGTGTGTCGGCAGCTGAACCGCTCTCCGATCTG-ACCCCTATCACGATTAGCATTAACTTACGTTGCTCGAATGC
Sequence 9 GGTATGTGTGTCGGCAGCTGAACCGCTCTCCGATCTG-ACCCCTATCACGATTAGCATTAACTTACGTTGCTCGAATGC
Sequence 10 GGTATGTGTGTCGGCAGCTGAACCGCTCTCCGATCTG-ACCCCTATCACGATTAGCATTAACTTACGTTGCTCGAATGC
Sequence 11 GGTATGTGTGTCGGCAGCTGAACCGCTCTCCGATCTG-ACCCCTATCACGATTAGCATTAACTTACGTTGCTCGAATGC
Sequence 12 GGTATGTGTGTCGGCAGCTGAACCGCTCTCCGATCTG-ACCCCTATCACGATTAGCATTAACTTACGTTGCTCGAATGC
Sequence 13 GGTATGTGTGTCGGCAGCTGAACCGCTCTCCGATCTG-ACCCCTATCACGATTAGCATTAACTTACGTTGCTCGAATGC
Sequence 14 GGTATGTGTGTCGGCAGCTGAACCGCTCTCCGATCTG-ACCCCTATCACGATTAGCATTAACTTACGTTGCTCGAATGC
Sequence 15 GGTATGTGTGTCGGCAGCTGAACCGCTCTCCGATCTG-AC-TATCACGAGTAGCATTAACTTACGTTGCTCGAATGC
Sequence 16 GGTATGTGTGTCGGCAGCTGAACCGCTCTCCGATCTG-ACCCCTATCACGATTAGCATTAACTTACGTTGCTCGAATGC
Sequence 17 GGTATGTGTGTCGGCAGCTGAACCGCTCTCCGATCTG-ACCCCTATCACGATTAGCATTAACTTACGTTGCTCGAATGC
Sequence 18 GGTATGTGTGTCGGCAGCTGAACCGCTCTCCGATCTG-ACCCCTATCACGATTAGCATTAACTTACGTTGCTCGAATGC
Sequence 19 GGTATGTGTGTCGGCAGCTGAACCGCTCTCCGATCTG-ACCCCTATCACGATTAGCATTAACTTACGTTGCTCGAATGC
Sequence 20 GGTATGTGTGTCGGCAGCTGAACCGCTCTCCGATCTG-ACCCCTATCACGATTAGCATTAACTTACGTTGCTCGAATGC
Required GGTATGTGTGTCGGCAGCTGAACCGCTCTCCGATCTGGACCCCTATCACGATTAGCATTAACTTACGTTGCTCGAATGC
```

**Figure S7: Sequencing results of clones of the PCR products of the reverse transcription products of templates T6 (CC control), T8 (C<sub>x</sub>C) and (T7 U<sub>x</sub>C):** From the template sequence (T8) GGGGUC<sub>x</sub>CAGA, the sequence TCTGGACCCC should be produced but instead of **GGA**, GA is incorrectly produced. From the template sequence (T7) GGGGUU<sub>x</sub>CAGA, the sequence TCTGAACCCC should be produced but instead of **GA**, GA is incorrectly produced. Therefore we can conclude that the purine base in red is the one that is omitted because the pyrimidine base at the 5'-side of the triazole linkage in the RT template is the one that is not copied (i.e. the one in blue).

## Reference

- 1- K. Fauster, M. Hartl, T. Santner, M. Aigner, C. Kreutz, K. Bister, E. Ennifar and R. Micura, ACS Chem. Biol. 2012, 7, 581-589
- 2- M. Aigner, M. Hartl, K. Fauster, J. Steger, K. Bister and R. Micura, ChemBioChem, 2011, 12, 47-51.
